# Supplementary material for: Trends in cesarean delivery rates in primipara and the associated factors
Source: PubMed Central journal article supplement (PMC7684937; doi:10.1186/s12884-020-03398-6), 2020-11-23
Supplement: 12884_2020_3398_MOESM1_ESM.pdf [file 12884_2020_3398_MOESM1_ESM.pdf]

**Table S1. Characteristics of maternal mothers between 1995 and 2019**

| <b>Variables</b>               | <b>VD</b>     | <b>CD</b>     | <b>Total</b>  | <b>p-value</b> |
|--------------------------------|---------------|---------------|---------------|----------------|
| <b>Maternal</b>                |               |               |               |                |
| <b>Year</b>                    |               |               |               | <0.0001        |
| 1995–1999                      | 7527 (6.3)    | 3177 (2.8)    | 10704 (4.6)   |                |
| 2000–2004                      | 7566 (6.3)    | 5921 (5.3)    | 13487 (5.8)   |                |
| 2005–2009                      | 15690 (13.0)  | 19219 (17.1)  | 34909 (15.0)  |                |
| 2010–2014                      | 33568 (27.9)  | 34411 (30.5)  | 67979 (29.2)  |                |
| 2015–2019                      | 55941 (46.5)  | 50021 (44.4)  | 105962 (45.5) |                |
| <b>Season</b>                  |               |               |               | <0.0001        |
| Spring                         | 28531 (23.7)  | 27714 (24.6)  | 56245 (24.1)  |                |
| Summer                         | 31132 (25.9)  | 29288 (26.0)  | 60420 (25.9)  |                |
| Autumn                         | 31920 (26.5)  | 28881 (25.6)  | 60801 (26.1)  |                |
| Winter                         | 28709 (23.9)  | 26866 (23.8)  | 55575 (23.9)  |                |
| <b>Age (years)</b>             |               |               |               | <0.0001        |
| <20                            | 446 (0.4)     | 205 (0.2)     | 651 (0.3)     |                |
| 20–24                          | 16797 (14.0)  | 9531 (8.5)    | 26328 (11.3)  |                |
| 25–29                          | 68773 (57.2)  | 52408 (46.5)  | 121181 (52.0) |                |
| 30–34                          | 28490 (23.7)  | 36295 (32.2)  | 64785 (27.8)  |                |
| >34                            | 5786 (4.8)    | 14310 (12.7)  | 20096 (8.6)   |                |
| <b>Gestational age (weeks)</b> |               |               |               | <0.0001        |
| <37                            | 7194 (6.0)    | 13073 (11.6)  | 20267 (8.7)   |                |
| 37–41                          | 112504 (93.5) | 99141 (87.9)  | 211645 (90.8) |                |
| >41                            | 594 (0.5)     | 535 (0.5)     | 1129 (0.5)    |                |
| <b>Gravidity</b>               |               |               |               | <0.0001        |
| 1                              | 65608 (54.5)  | 48327 (42.9)  | 113935 (48.9) |                |
| 2–3                            | 46731 (38.9)  | 49786 (44.2)  | 96517 (41.4)  |                |
| >3                             | 7953 (6.6)    | 14636 (13.0)  | 22589 (9.7)   |                |
| <b>Fetus number</b>            |               |               |               | <0.0001        |
| Singleton                      | 119922 (99.7) | 108408 (96.2) | 228330 (98.0) |                |
| Multiparous                    | 370 (0.3)     | 4341 (3.9)    | 4711 (2.0)    |                |
| <b>Complications</b>           |               |               |               | <0.0001        |
| Yes                            | 26881 (22.4)  | 55093 (48.9)  | 81974 (35.2)  |                |
| No/Unclassified                | 93411 (77.7)  | 57656 (51.1)  | 151067 (64.8) |                |
| <b>Neonatal</b>                |               |               |               |                |
| <b>Position</b>                |               |               |               | <0.0001        |
| Head                           | 119221 (99.4) | 97726 (90.2)  | 216947 (95.0) |                |
| Breech                         | 328 (0.3)     | 9815 (9.1)    | 10143 (4.4)   |                |
| Other                          | 28 (0.0)      | 354 (0.3)     | 382 (0.2)     |                |
| Unclassified                   | 345 (0.3)     | 513 (0.5)     | 858 (0.4)     |                |
| <b>Sex</b>                     |               |               |               | <0.0001        |
| Male                           | 62738 (52.3)  | 59011 (54.4)  | 121749 (53.3) |                |
| Female                         | 57170 (47.7)  | 49391 (45.6)  | 106561 (46.7) |                |

|              |               |              |               |         |
|--------------|---------------|--------------|---------------|---------|
| Unclassified | 14 (0)        | 6 (0)        | 20 (0)        |         |
| Weight (g)   |               |              |               | <0.0001 |
| 1000–1500    | 451 (0.4)     | 441 (0.4)    | 892 (0.4)     |         |
| 1500–2499    | 4054 (3.4)    | 5886 (5.4)   | 9940 (4.4)    |         |
| 2500–3999    | 110726 (92.3) | 92047 (84.9) | 202773 (88.8) |         |
| 4000–4499    | 4466 (3.7)    | 8844 (8.2)   | 13310 (5.8)   |         |
| >4499        | 225 (0.2)     | 1190 (1.1)   | 1415 (0.6)    |         |

---

Abbreviations: VD, vaginal delivery; CD, cesarean delivery.

**Table S2. Joinpoint regression analysis of trends in cesarean delivery rates stratified by age and fetal weight during 1995–2019**

| Variables        | Trend 1   |                         | Trend 2   |                          | Trend 3   |                         | Full period           |
|------------------|-----------|-------------------------|-----------|--------------------------|-----------|-------------------------|-----------------------|
|                  | Period    | APC                     | Period    | APC                      | Period    | APC                     | AAPC                  |
| Total            | 1995–2006 | <b>7.8 (4.8, 10.9)</b>  | 2006–2016 | <b>-4.1 (-5.5, -2.6)</b> | 2016–2019 | 3.5 (-3.7, 11.3)        | <b>2.2 (0.6, 3.8)</b> |
| Age (years)      |           |                         |           |                          |           |                         |                       |
| <25              | 1995–2009 | <b>5.5 (3.2, 7.9)</b>   | 2009–2016 | <b>-7.9 (-12, -3.5)</b>  | 2016–2019 | 9.2 (-6.9, 28.1)        | 1.8 (-0.7, 4.5)       |
| 25–29            | 1995–2006 | <b>7.6 (4.4, 10.8)</b>  | 2006–2016 | <b>-4.9 (-6.5, -3.3)</b> | 2016–2019 | 3.7 (-4.8, 13.0)        | 1.7 (-0.1, 3.5)       |
| 30–34            | 1995–2007 | <b>3.5 (1.3, 5.8)</b>   | 2007–2016 | <b>-3.6 (-4.9, -2.4)</b> | 2016–2019 | 1.5 (-3.4, 6.6)         | 0.5 (-0.7, 1.8)       |
| >34              | 1995–2005 | <b>2.8 (1.0, 4.5)</b>   | 2005–2019 | <b>-1.4 (-1.7, -1.1)</b> |           |                         | 0.3 (-0.4, 1.0)       |
| Fetal weight     |           |                         |           |                          |           |                         |                       |
| Low birth weight | 1995–2010 | <b>5.1 (3.1, 7.2)</b>   | 2010–2016 | -3 (-6.7, 0.8)           | 2016–2019 | <b>14.8 (8.4, 21.7)</b> | <b>4.2 (2.5, 5.8)</b> |
| Normal           | 1995–2006 | <b>8.6 (5.3, 12.1)</b>  | 2006–2016 | <b>-4.7 (-6.3, -3.1)</b> | 2016–2019 | 4.3 (-3.8, 12.9)        | <b>2.3 (0.5, 4.1)</b> |
| Macrosomia       | 1995–2000 | <b>11.3 (1.6, 22.0)</b> | 2000–2019 | <b>-0.9 (-1.4, -0.3)</b> |           |                         | 1.6 (-0.3, 3.4)       |

Abbreviations: APC: annual percentage change; AAPC: average annual percentage change; Bold values represent statistical significance (two-sided p<0.05)

**Table S3. Joinpoint regression analysis of trends in the proportion of fetal weight during 1995–2019**

| Variables        | Trend 1   |                          | Trend 2   |                            | Trend 3   |                          | Full period<br>AAPC      |
|------------------|-----------|--------------------------|-----------|----------------------------|-----------|--------------------------|--------------------------|
|                  | Period    | APC                      | Period    | APC                        | Period    | APC                      |                          |
| Low birth weight | 1995–2011 | <b>2.8 (0.9, 4.7)</b>    | 2011–2016 | <b>-9.9 (-16.7, -2.6)</b>  | 2016–2019 | <b>24.5 (12.4, 37.9)</b> | <b>2.4 (0.1, 4.7)</b>    |
| Normal           | 1995–2004 | -0.2 (-0.6, 0.2)         | 2004–2019 | <b>0.2 (0.1, 0.3)</b>      |           |                          | 0.1 (-0.1, 0.2)          |
| Macrosomia       | 1995–2016 | <b>-1.2 (-1.8, -0.6)</b> | 2016–2019 | <b>-10.8 (-17.5, -3.7)</b> |           |                          | <b>-2.4 (-3.4, -1.4)</b> |

Abbreviations: APC: annual percentage change; AAPC: average annual percentage change; Bold values represent statistical significance (two-sided p<0.05)

**Table S4. Joinpoint regression analysis of trends in cesarean delivery rates stratified by age and fetal weight during 2005–2019**

| Variables        | Trend 1   |                          | Trend 2   |                           | Trend 3   |                         | Full period              |
|------------------|-----------|--------------------------|-----------|---------------------------|-----------|-------------------------|--------------------------|
|                  | Period    | APC                      | Period    | APC                       | Period    | APC                     | AAPC                     |
| Total            | 2005–2016 | <b>-3.9 (-5.0, -2.7)</b> | 2016–2019 | 3.4 (-3.2, 10.5)          |           |                         | <b>-2.4 (-3.8, -0.9)</b> |
| Age (years)      |           |                          |           |                           |           |                         |                          |
| <25              | 2005–2010 | 1.4 (-4.7, 7.9)          | 2010–2016 | <b>-8.4 (-13.1, -3.3)</b> | 2016–2019 | 9.8 (-3.6, 25.0)        | -1.2 (-4.6, 2.3)         |
| 25–29            | 2005–2016 | <b>-4.8 (-6.0, -3.6)</b> | 2016–2019 | 3.6 (-3.6, 11.3)          |           |                         | <b>-3.0 (-4.6, -1.5)</b> |
| 30–34            | 2005–2016 | <b>-3.3 (-4.2, -2.4)</b> | 2016–2019 | 1.2 (-3.2, 5.8)           |           |                         | <b>-2.3 (-3.4, -1.3)</b> |
| >34              | 2005–2019 | <b>-1.5 (-1.9, -1.1)</b> |           |                           |           |                         | <b>-1.5 (-1.9, -1.1)</b> |
| Fetal weight     |           |                          |           |                           |           |                         |                          |
| Low birth weight | 2005–2010 | 5.1 (-1.2, 11.8)         | 2010–2016 | -2.9 (-7.1, 1.4)          | 2016–2019 | <b>14.6 (6.5, 23.3)</b> | <b>3.5 (0.7, 6.3)</b>    |
| Normal           | 2005–2016 | <b>-4.5 (-5.8, -3.2)</b> | 2016–2019 | 4.1 (-3.5, 12.4)          |           |                         | <b>-2.7 (-4.4, -1.1)</b> |
| Macrosomia       | 2005–2019 | <b>-1.3 (-1.9, -0.8)</b> |           |                           |           |                         | <b>-1.3 (-1.9, -0.8)</b> |

Abbreviations: APC: annual percentage change; AAPC: average annual percentage change; Bold values represent statistical significance (two-sided p<0.05)

**Table S5. Joinpoint regression analysis of trends in the proportion of fetal weight during 2005–2019**

| Variables        | Trend 1   |                       | Trend 2   |                            | Trend 3   |                          | Full period<br>AAPC      |
|------------------|-----------|-----------------------|-----------|----------------------------|-----------|--------------------------|--------------------------|
|                  | Period    | APC                   | Period    | APC                        | Period    | APC                      |                          |
| Low birth weight | 2005–2013 | -0.3 (-4.4, 4.0)      | 2013–2016 | -14.1 (-36.6, 16.3)        | 2016–2019 | <b>26.5 (11.7, 43.3)</b> | 1.6 (-4.5, 8.1)          |
| Normal           | 2005–2019 | <b>0.2 (0.1, 0.3)</b> |           |                            |           |                          | <b>0.2 (0.1, 0.3)</b>    |
| Macrosomia       | 2005–2016 | -0.7 (-2.0, 0.6)      | 2016–2019 | <b>-11.3 (-18.2, -3.9)</b> |           |                          | <b>-3.1 (-4.8, -1.3)</b> |

Abbreviations: APC: annual percentage change; AAPC: average annual percentage change; Bold values represent statistical significance (two-sided p<0.05)
